# Supplementary material
Source: ML conference proceedings conference paper supplement (https://openreview.net/forum?id=NMoeVEwekzC)

Differential Q-Learning

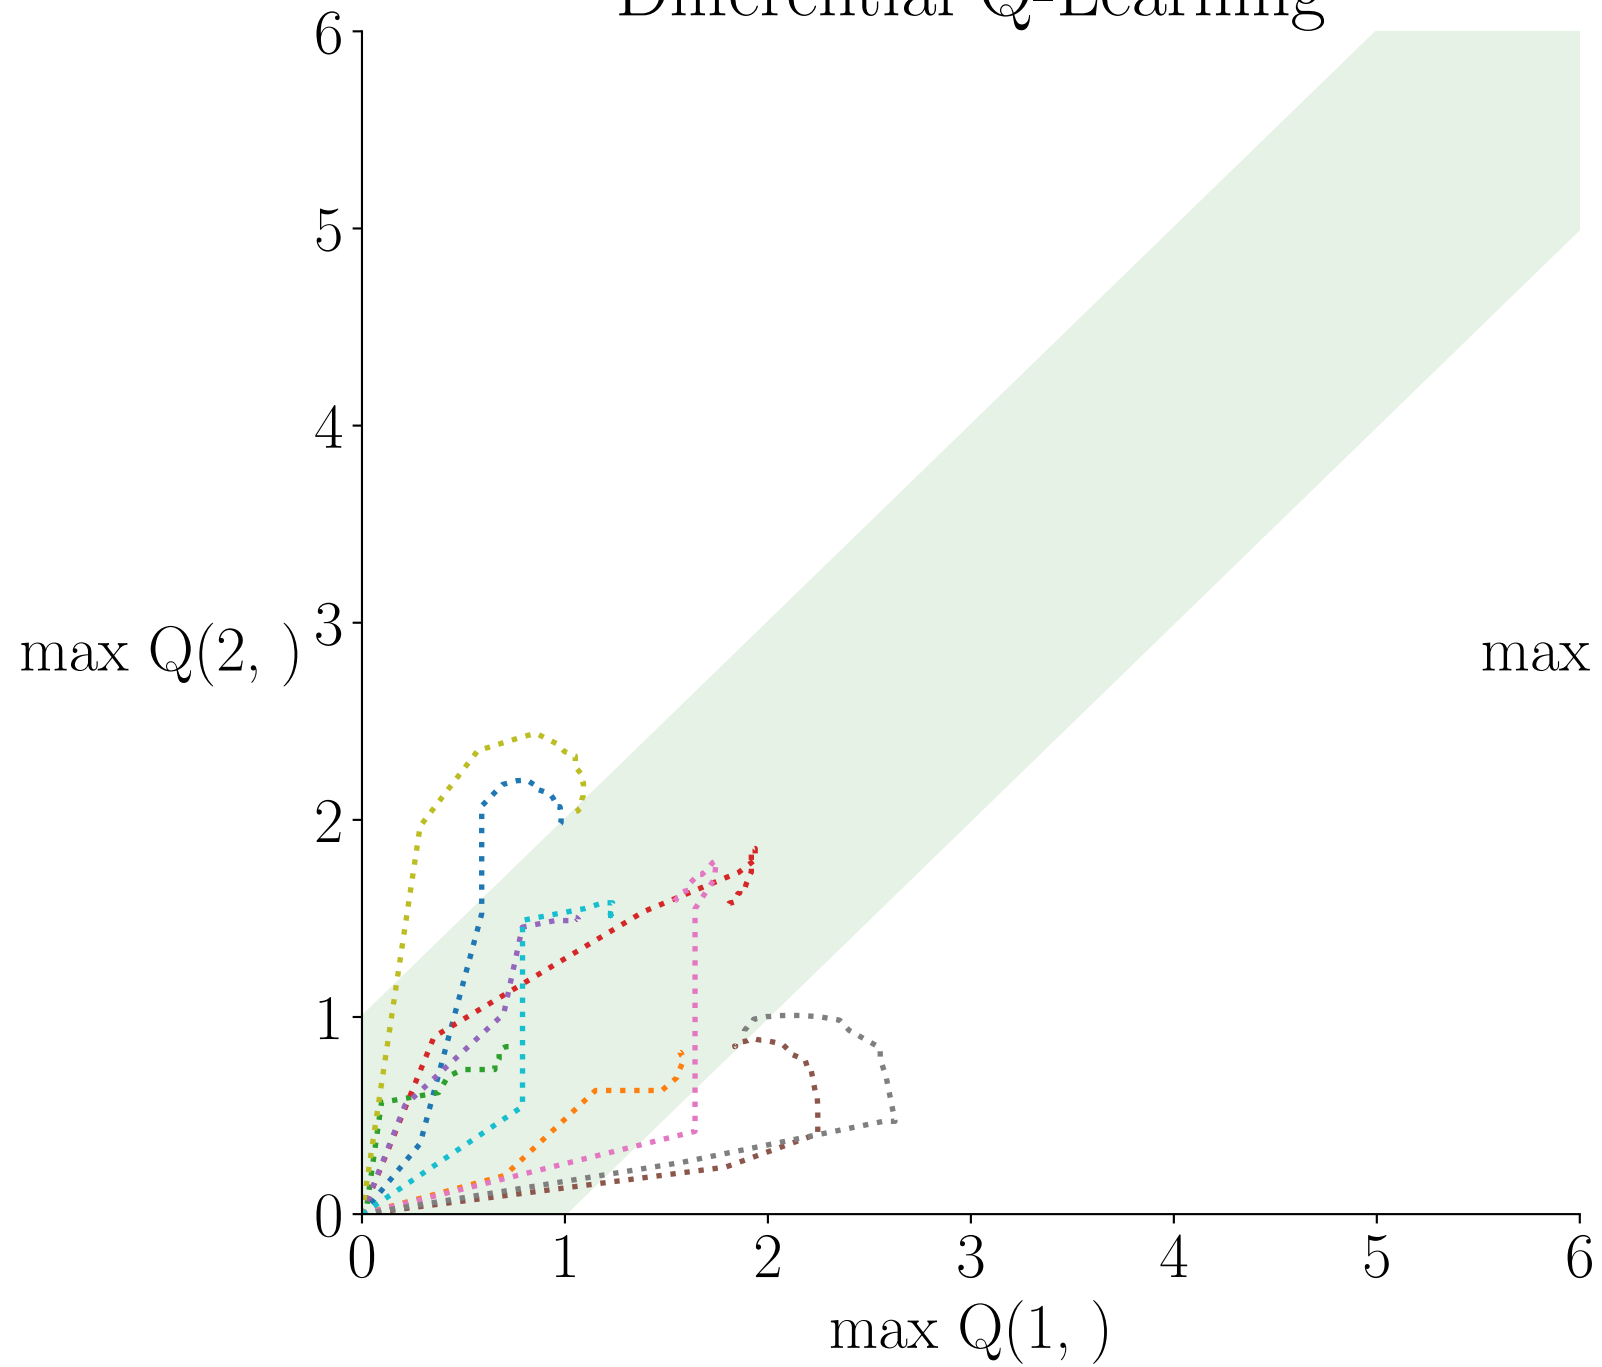

RVI Q-Learning

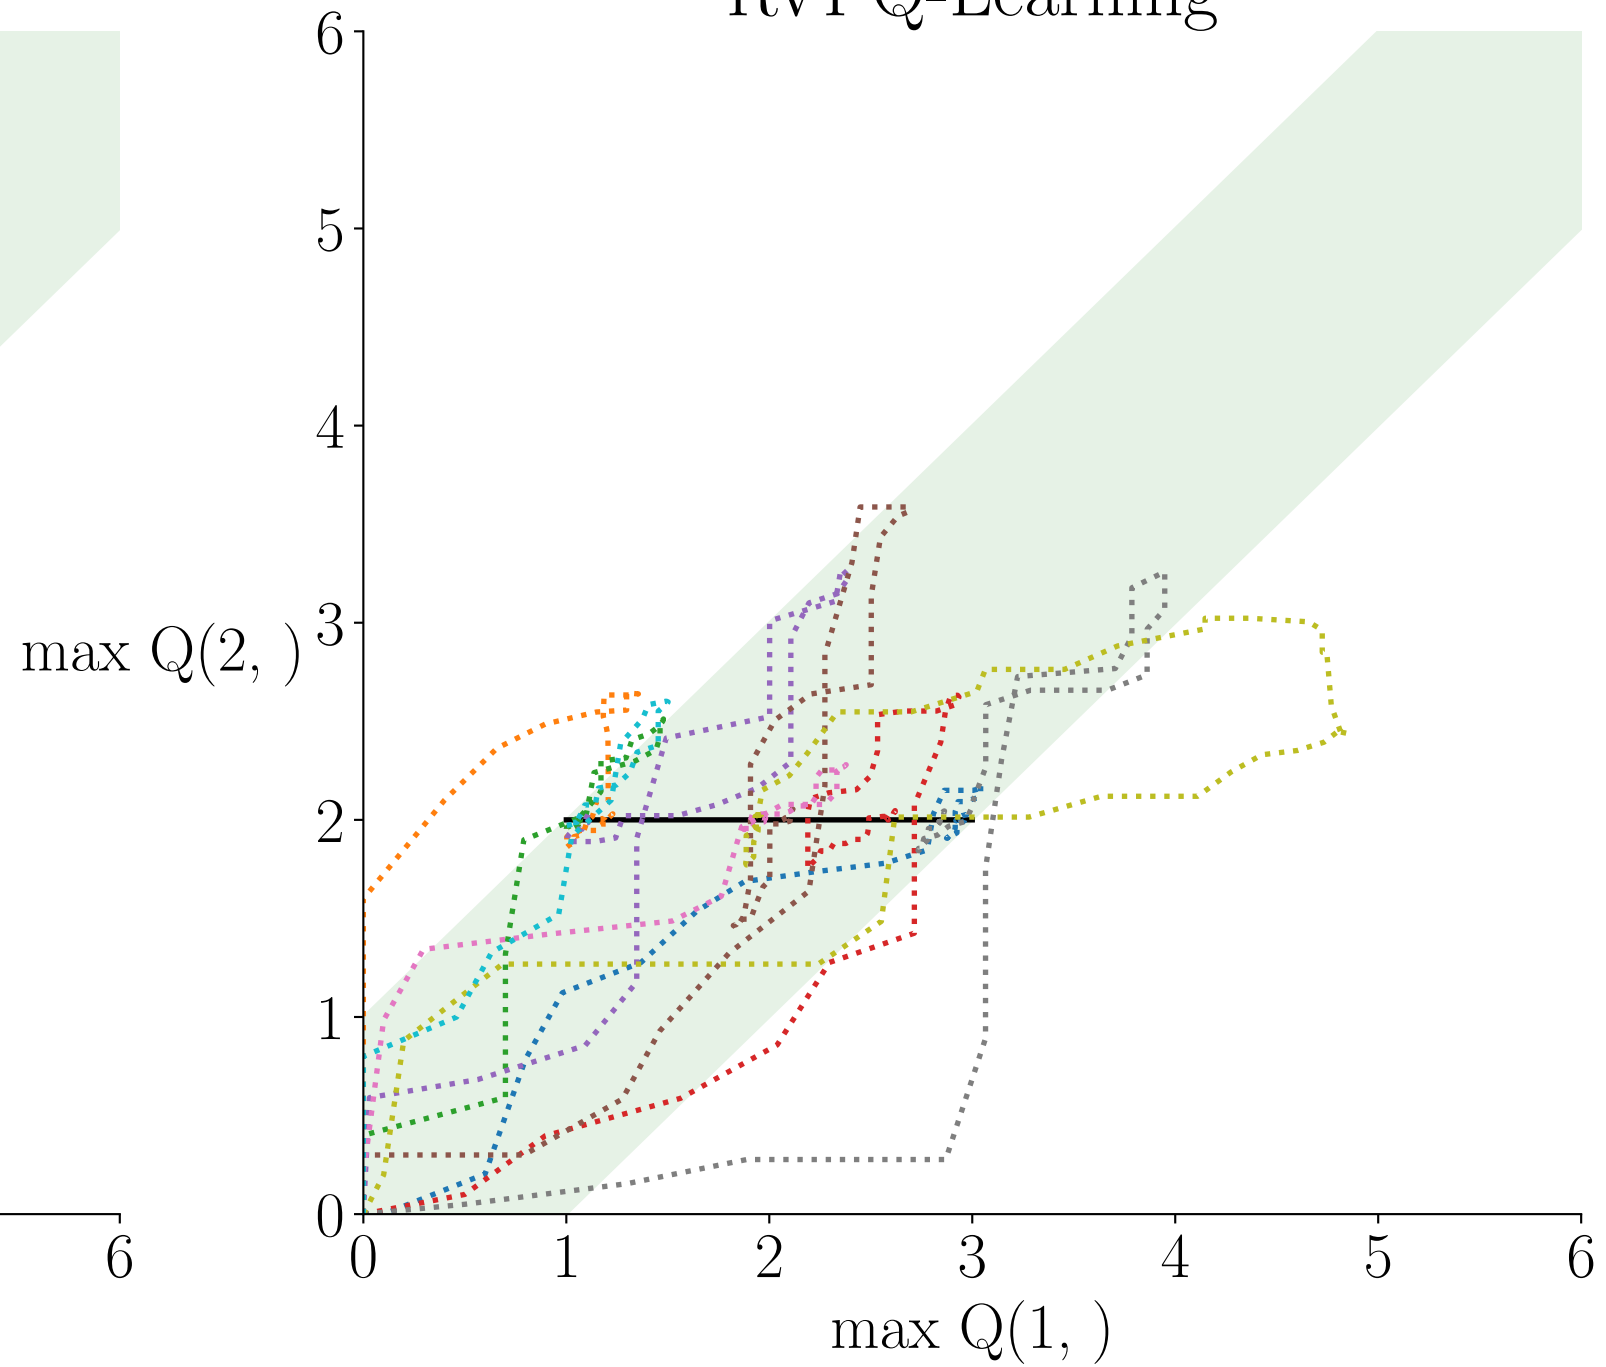

Supplement: supplementary_material [file attachment]

Differential Q-Learning

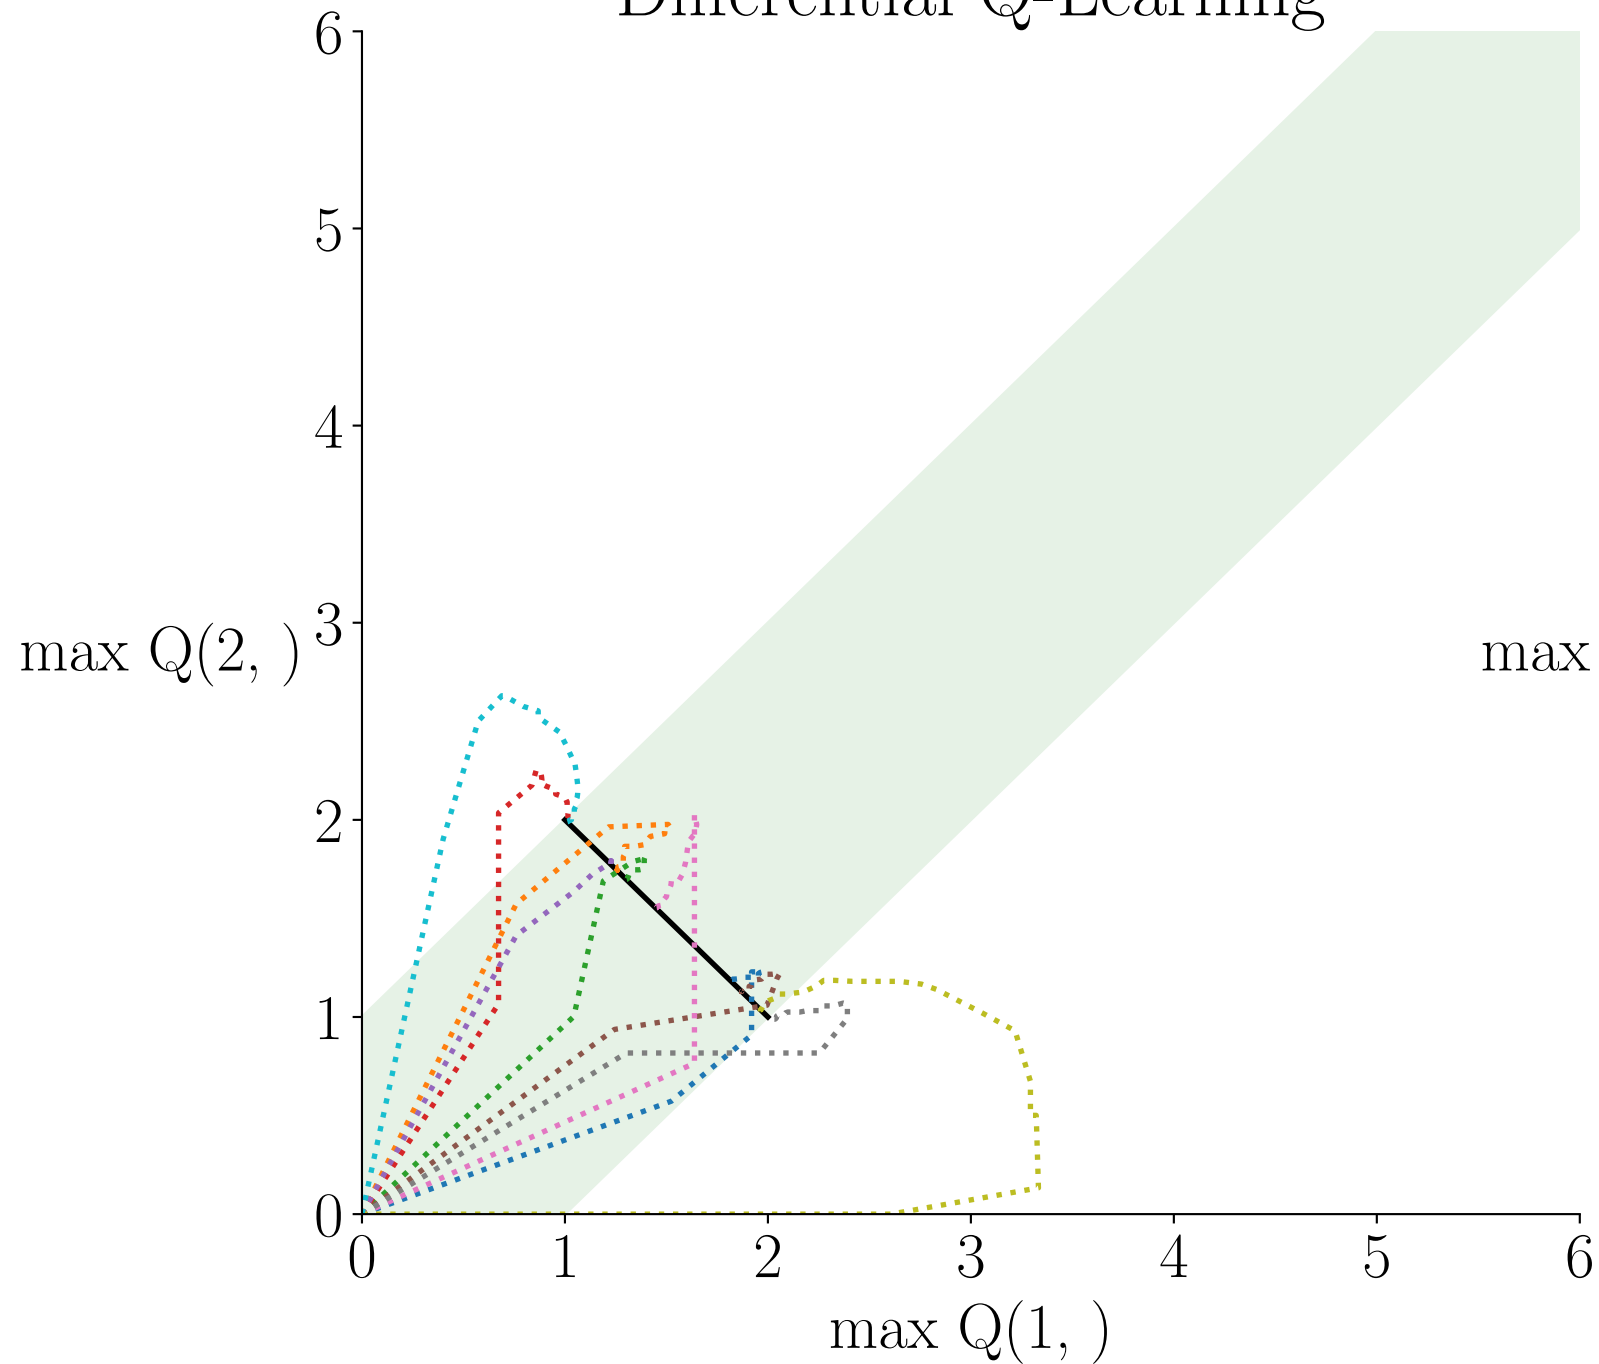

RVI Q-Learning

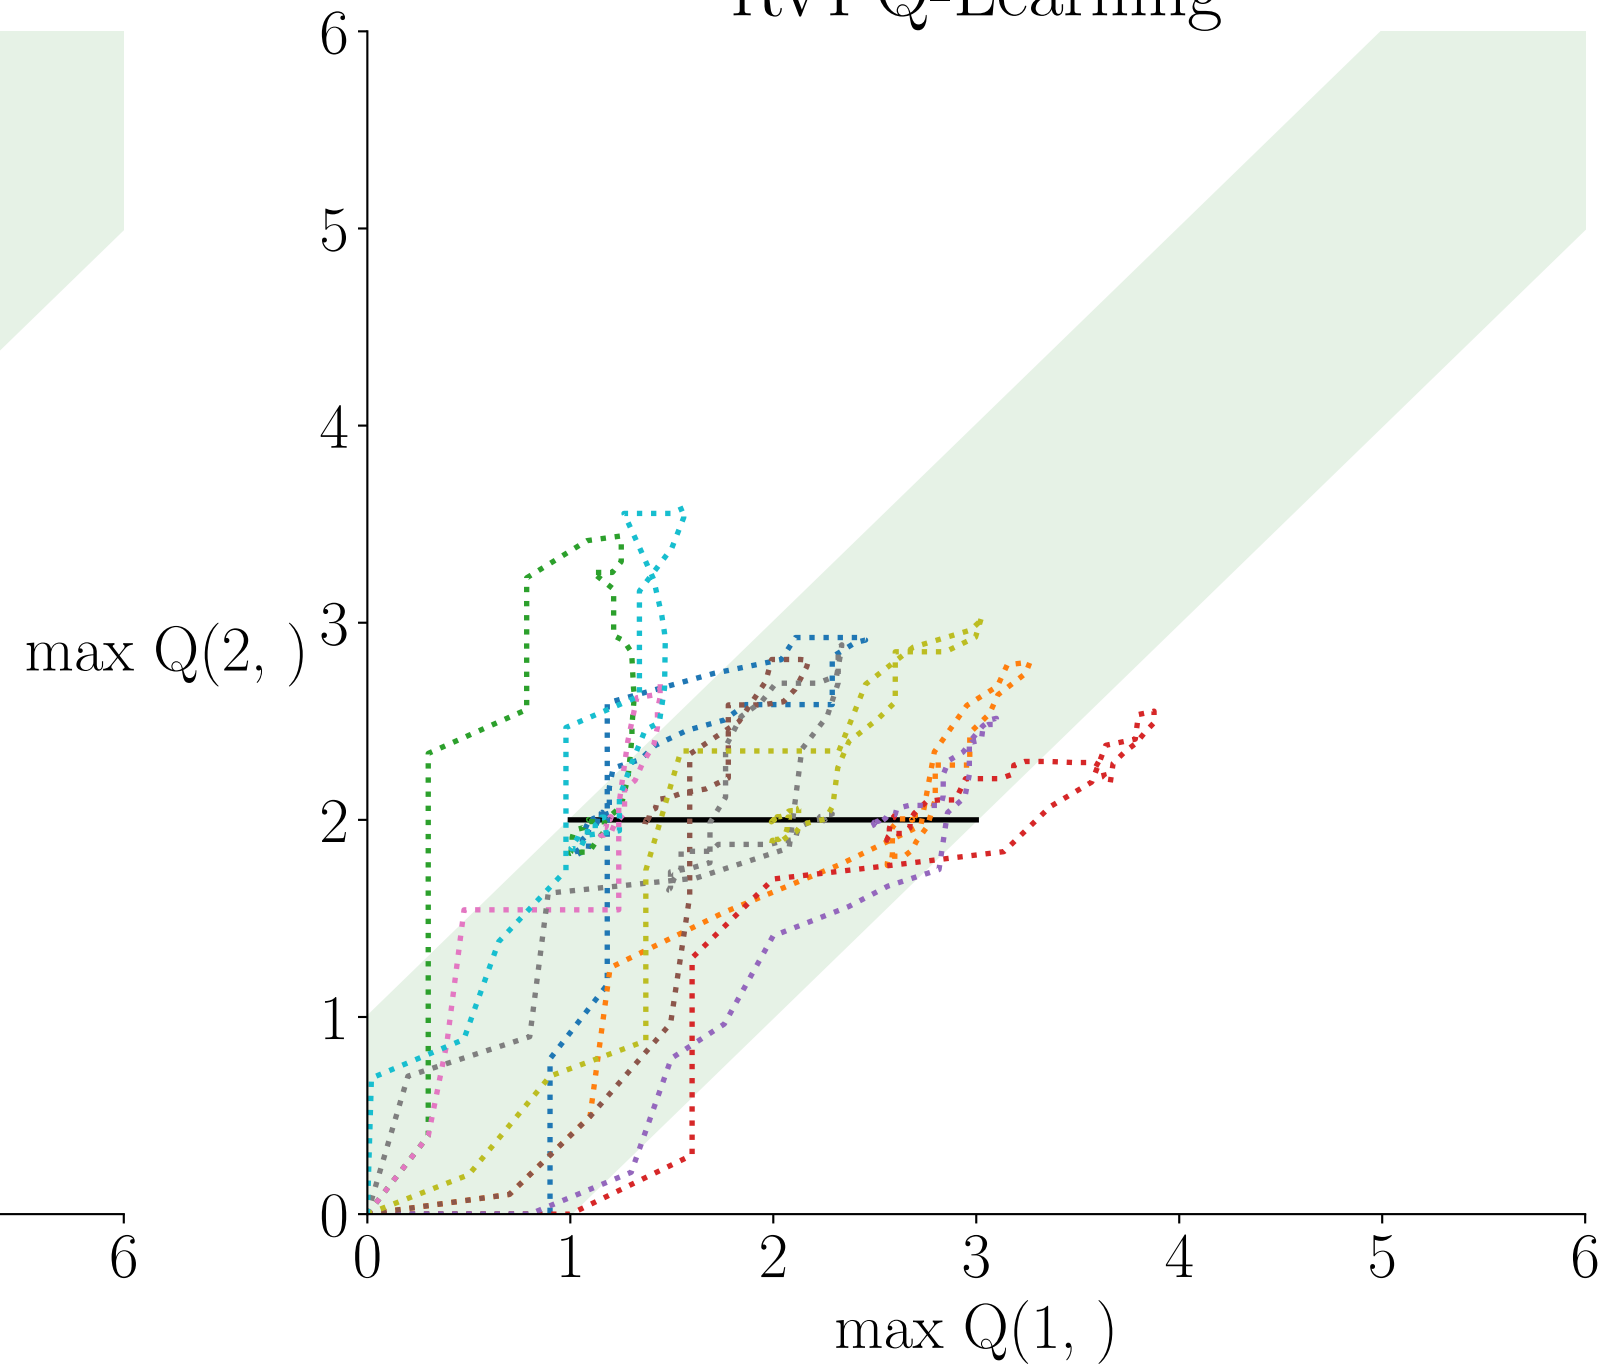

Supplement: supplementary_material [file attachment]
